# Supplementary material
Source: Springer Nature journal article supplement (https://www.springermedizin.de/resource/supplementary/12987_2012_72_MOESM1_ESM.pdf/9680276)
Supplement: MOESM1 [file 9680276]

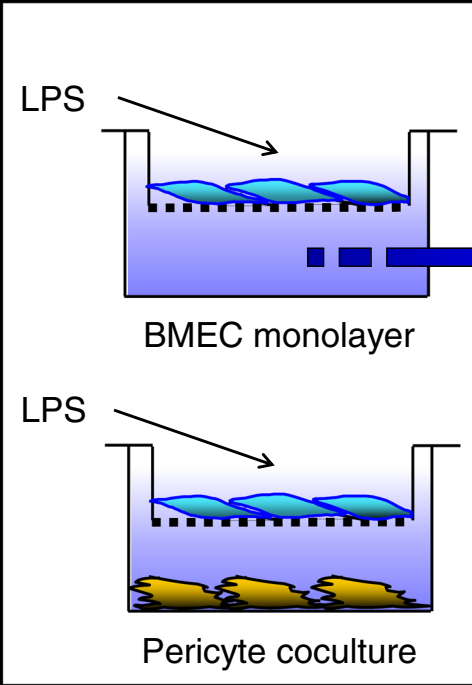

Collect culture medium from abluminal side of BMEC monolayers

**Conditioned Media (CM)**

- BMEC CM
- LPS-treated BMEC CM

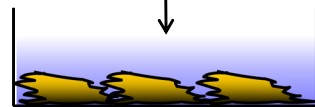

Pericyte culture

Permeability study

Cytokine assay
